# Supplementary material
Source: PubMed Central journal article supplement (PMC2924597)
Supplement: jn.109.119131_1.pdf [file jn.109.119131_1.pdf]

Online Supporting Material (one figure, one table)

Supplemental Figure 1. CONSORT diagram illustrating enrollment of participants for the analyses reported in this paper.

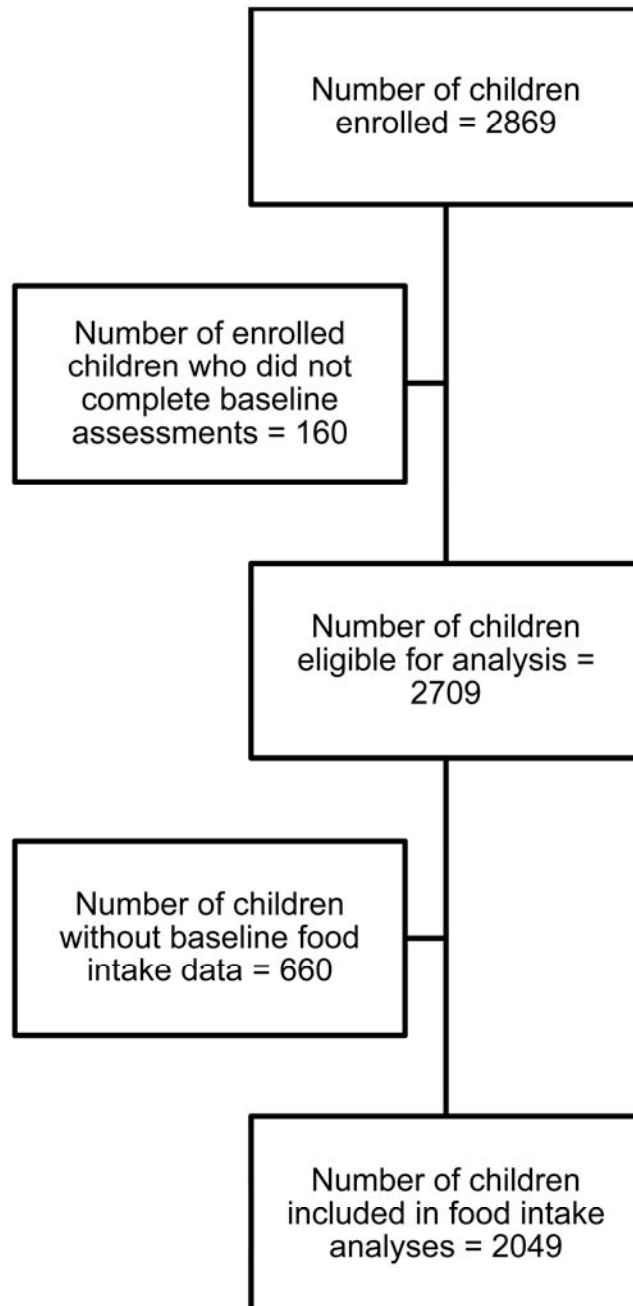

SMI standards and food intake in schools

Supplemental Table 1. Percent of children whose food selection from school cafeterias met the SMI standards by BMI percentile group and grade level.

| Met SMI Standards | BMI Percentile Category         |                                     |                                 |                              | <i>P</i>           | School Grade Level                     |                                        |                                        | <i>P</i>            |
|-------------------|---------------------------------|-------------------------------------|---------------------------------|------------------------------|--------------------|----------------------------------------|----------------------------------------|----------------------------------------|---------------------|
|                   | Under Wt.<br><i>n</i> = 51<br>% | Healthy Wt.<br><i>n</i> = 1083<br>% | Over Wt.<br><i>n</i> = 350<br>% | Obese<br><i>n</i> = 565<br>% |                    | 4 <sup>th</sup><br><i>n</i> = 751<br>% | 5 <sup>th</sup><br><i>n</i> = 675<br>% | 6 <sup>th</sup><br><i>n</i> = 623<br>% |                     |
| Food Selection    |                                 |                                     |                                 |                              |                    |                                        |                                        |                                        |                     |
| Energy            | 84.3                            | 75.8                                | 78.6                            | 77.0                         | 0.59               | 74.3                                   | 77.9                                   | 78.7                                   | 0.53                |
| Total Fat         | 31.4                            | 25.0                                | 26.0                            | 29.9                         | 0.09               | 27.7                                   | 24.1                                   | 28.3                                   | 0.87                |
| Saturated Fat     | 23.5                            | 28.9                                | 27.7                            | 29.9                         | 0.93               | 28.8                                   | 29.9                                   | 27.8                                   | 0.36                |
| Protein           | 100.0                           | 99.9                                | 100.0                           | 100.0                        | 1.00               | 100.0                                  | 99.9                                   | 100.0                                  | 1.00                |
| Calcium           | 92.2                            | 85.3                                | 85.1                            | 87.8                         | 0.21               | 87.0                                   | 84.6                                   | 86.8                                   | 0.03                |
| Iron              | 100.0                           | 93.8                                | 95.1                            | 92.6                         | NA                 | 92.9                                   | 95.1                                   | 93.6                                   | 0.26                |
| Vitamin A         | 52.9                            | 51.5                                | 53.1                            | 56.8                         | 0.19               | 52.9                                   | 54.8                                   | 52.2                                   | 0.81                |
| Vitamin C         | 43.1                            | 39.7                                | 47.1                            | 44.2                         | <0.01 <sup>1</sup> | 42.1                                   | 43.1                                   | 41.7                                   | <0.001 <sup>1</sup> |

Note. Classification of BMI percentile followed the American Academy of Pediatrics (16) criteria for childhood underweight (< 5<sup>th</sup> BMI percentile), healthy weight (5<sup>th</sup> - < 85<sup>th</sup> percentile), overweight (85<sup>th</sup> - < 95<sup>th</sup> percentile,) and obesity ( $\geq$  95<sup>th</sup> percentile). *P* values indicate if the proportion of participants meeting the recommendations differed across BMI percentile categories and grade levels (the significance level was < 0.05 after Tukey-Kramer adjustment). <sup>1</sup>Although the logistic regression was significant, no specific comparisons among BMI Percentile Categories reached statistical significance.
